# Supplementary material for: Opposite feedback from mTORC1 to H-ras and K-ras4B downstream of SREBP1
Source: PubMed Central journal article supplement (PMC5567141; doi:10.1038/s41598-017-09387-8), 2017-08-21
Supplement: 41598_2017_9387_MOESM1_ESM.pdf [file 41598_2017_9387_MOESM1_ESM.pdf]

## Supplementary information

### Opposite feedback from mTORC1 to H-ras and K-ras4B downstream of SREBP1

#### Authors

Itziar MD Posada<sup>1,2</sup>, Benoit Lectez<sup>1,2</sup>, Farid A Siddiqui<sup>1</sup>, Christina Oetken-Lindholm<sup>1</sup>, Mukund Sharma<sup>1</sup>, Daniel Abankwa<sup>1,\*</sup>

<sup>1</sup> Turku Centre for Biotechnology, Åbo Akademi University, Tykistökatu 6B, 20520

Turku, Finland

<sup>2</sup> Co-first author

\* Correspondence: [daniel.abankwa@utu.fi](mailto:daniel.abankwa@utu.fi); tel. +358 2 333 6969

## Supplementary Figures

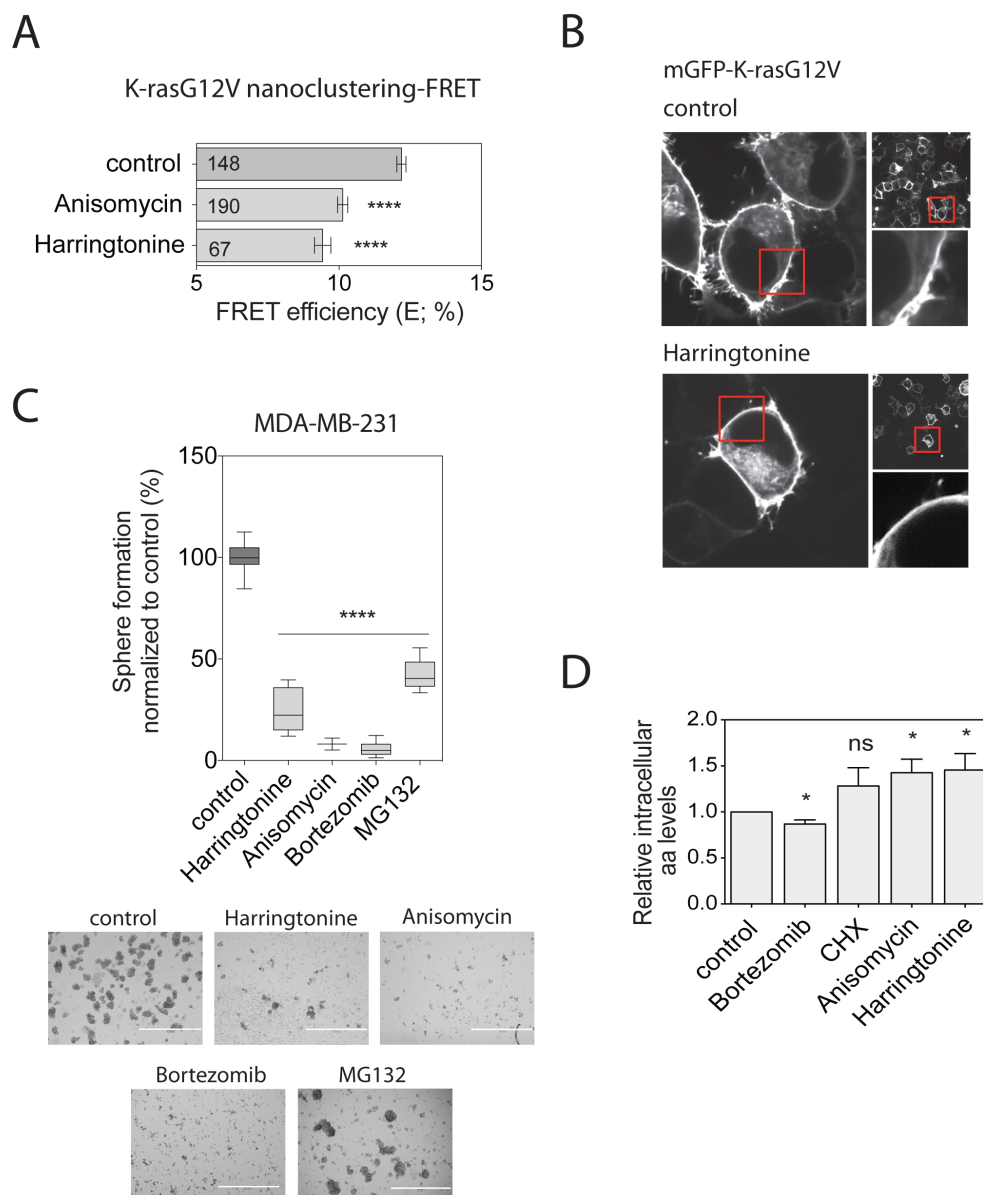

### Supplementary Figure 1.

**(A)** Nanoclustering-FRET analysis in HEK cells coexpressing mGFP- and mCherry-tagged K-rasG12V. Cells were treated for 24 h with either DMSO control, 2  $\mu$ M anisomycin or 2  $\mu$ M harringtonine. The numbers in the bars indicate the number of analyzed cells (mean  $\pm$  SEM,  $n \geq 3$ ).

**(B)** Confocal images of mGFP-K-rasG12V transiently expressed in HEK cells treated

with DMSO control (*left*) or 2  $\mu$ M harringtonine (*right*). Representative images from two independent experiments are shown.

**(C)** Mammosphere-forming efficiency of MDA-MB-231 cells grown in non-adherent conditions. Mammospheres were allowed to form for 6 days and treated for additional 3 days with DMSO control, 2  $\mu$ M of harringtonine, 2  $\mu$ M of anisomycin, 0.4  $\mu$ M of bortezomib or 0.5  $\mu$ M of MG132. On the top, the mammosphere-forming efficiency was measured as the number of spheres formed and normalized to control (mean  $\pm$  SEM, n=2). On the bottom, representative images of mammospheres are shown as indicated. Scale bar represents 1000  $\mu$ m.

**(D)** Determination of intracellular amino acid levels. BHK cells were serum starved for 16 h and subsequently treated for 1 h with DMSO control, 0.4  $\mu$ M bortezomib, 0.18  $\mu$ M CHX, 2  $\mu$ M anisomycin or 2  $\mu$ M harringtonine. Note that CHX was used at a minimal concentration here that reportedly does not fully block protein synthesis<sup>1,2</sup>. Amino acid levels are shown as mean  $\pm$  SEM of triplicate samples relative to control. Statistical significance levels are annotated as ns, not significant; \*, p < 0.05; \*\*\*\*, p < 0.0001.

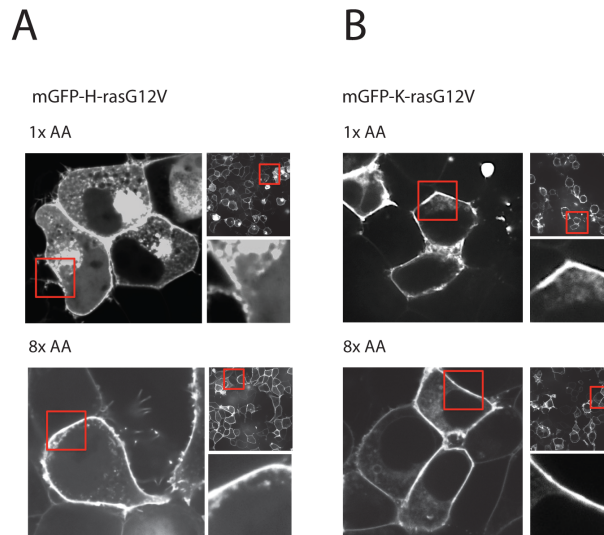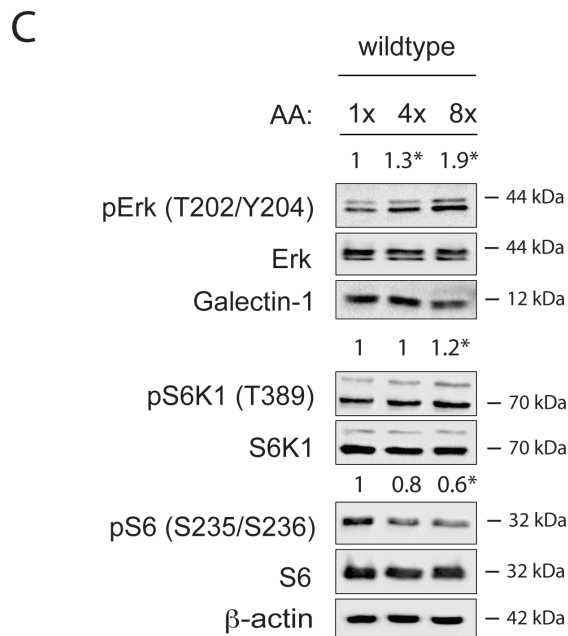

**Supplementary Figure 2.**

**(A-B)** Confocal images of mGFP-H-rasG12V **(A)** or mGFP-K-rasG12V **(B)** expressed in HEK cells incubated for 24 h in BME medium complemented with serum and 1x (*top*) or 8x (*bottom*) amino acid concentration. Representative images from two independent experiments are shown.

**(C)** Western blot analysis of Ras and mTORC1 signalling in wildtype HEK cells. Cells were treated as in **(A-B)** under serum-starved conditions. Numbers indicate the

ratio of phosphorylated/ cleaved protein normalized to total protein/ actin levels, respectively (n=4). Statistical significance levels are annotated as \*,  $p < 0.05$ .

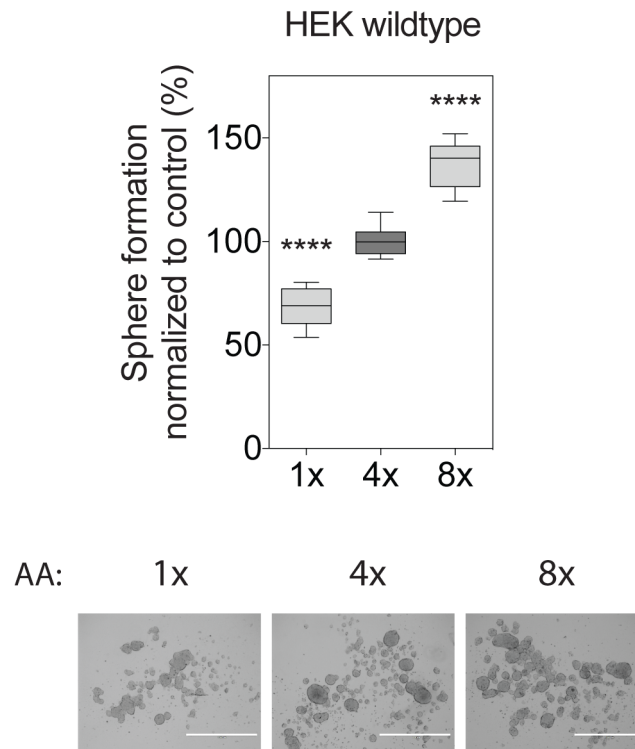

### Supplementary Figure 3.

Sphere-forming efficiency of wildtype HEK cells grown under non-adherent conditions. Spheres were allowed to grow with increasing aminoacid concentrations for 9 days. On the left, the sphere-forming efficiency was measured as the number of spheres formed and normalized to control (n=3). On the right, representative images of spheres are shown as indicated. Scale bar represents 1000  $\mu\text{m}$ . Statistical significance levels are annotated as \*\*\*\*,  $p < 0.0001$ .

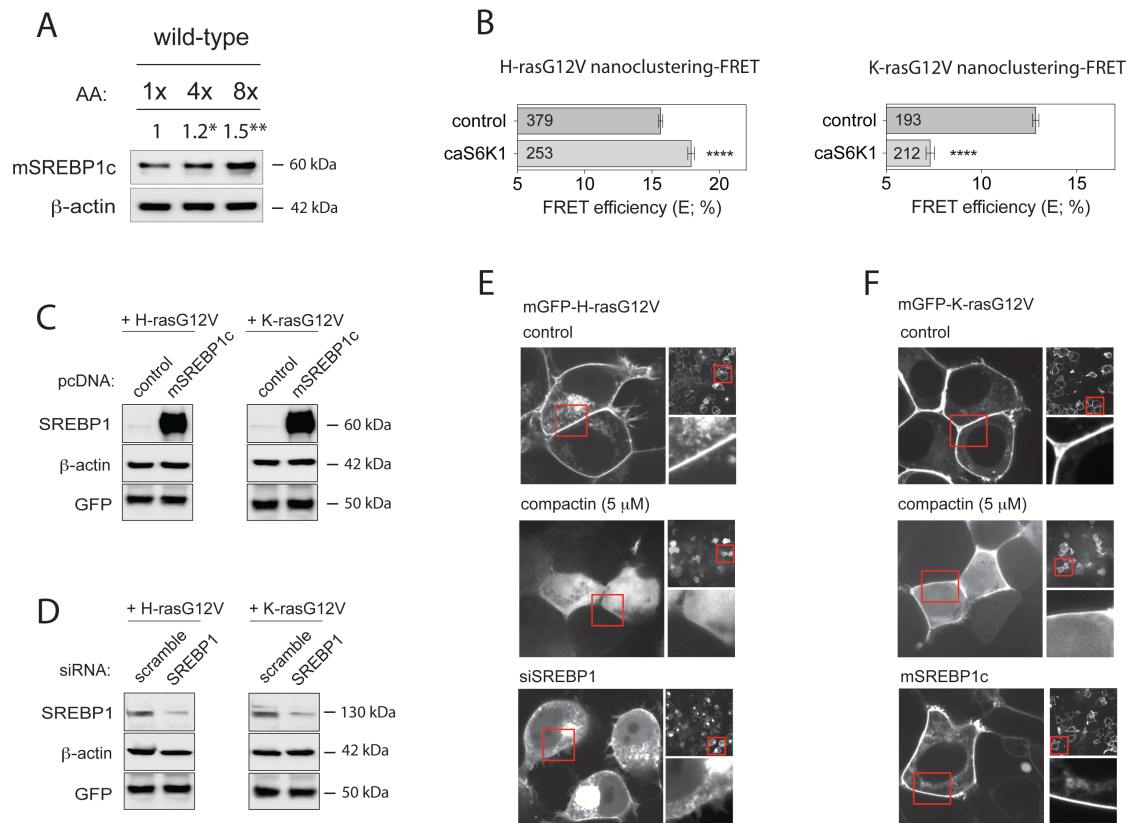

#### Supplementary Figure 4.

(A) Western blot analysis of mSREBP1c in wildtype HEK cells. Cells were incubated for 24 h with increasing concentrations of amino acids (1x, 4x or 8x) in the absence of serum. Numbers indicate  $\beta$ -actin normalized mSREBP1 levels (n=3).

(B) Nanoclustering-FRET analysis in HEK cells transfected with constitutively active form of S6K1, caS6K1, or empty vector, co-expressing mGFP- and mCherry-tagged H-rasG12V (left) or K-rasG12V (right). The numbers in the bars indicate the number of analyzed cells (mean  $\pm$  SEM, n=4).

(C-D) Western blot analysis of SREBP1 mature form expression, mSREBP1c (C), and of SREBP1 knockdown (D) in HEK cells expressing mGFP-H-rasG12V (left) or mGFP-K-rasG12V (right).

(E-F) Confocal images of mGFP-H-rasG12V (E) or mGFP-K-rasG12V (F)

expressed in HEK cells, and treated with compactin, a mevalonate pathway inhibitor, or upon SREBP1 knockdown (**E**) or mSREBP1c overexpression (**F**). Representative images from two independent experiments are shown.

Statistical significance levels are annotated as \*,  $p < 0.05$ ; \*\*,  $p < 0.01$ ; \*\*\*\*,  $p < 0.0001$ .

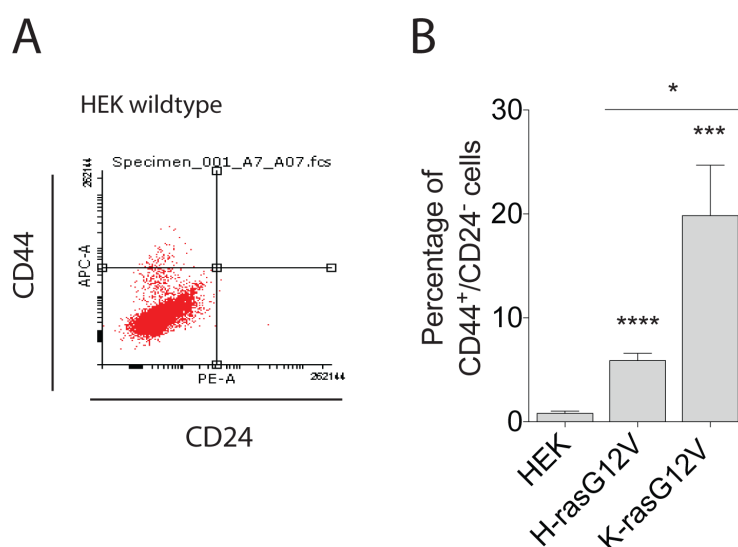

### Supplementary Figure 5.

(A) CD44/CD24 FACS profiles are shown for wildtype HEK cells.

(B) Shown is the average percentage of CD44<sup>+</sup>/CD24<sup>-</sup> for wildtype HEK cells and HEK cells expressing H-rasG12V or K-rasG12V. Error bars denote the SEM from three independent experiments performed in duplicate. Statistical significance levels are annotated as \*,  $p < 0.05$ ; \*\*\*,  $p < 0.001$ ; \*\*\*\*,  $p < 0.0001$ .

### Supplementary References

1. Ahearn, I. M. *et al.* FKBP12 Binds to Acylated H-Ras and Promotes Depalmitoylation. *Mol. Cell* **41**, 173–185 (2011).
2. Najumudeen, A. K. *et al.* Phenotypic Screening Identifies Protein Synthesis Inhibitors as H-Ras-Nanocluster-Increasing Tumor Growth Inducers.

*Biochemistry* **54**, 7212–7221 (2015).
